# Supplementary material for: Silencing of Opisthorchis viverrini Tetraspanin Gene Expression Results in Reduced Secretion of Extracellular Vesicles
Source: Frontiers journal article supplement (doi:10.3389/fcimb.2022.827521), 2022-02-11
Supplement: Data_Sheet_4.XLSX [file Data_Sheet_4.XLSX]

## Sheet: 0
Supplementary Table 4. Membrane proteins from Opisthorchis viverrini-derived 120k extracellular vesicles.
Main Accession	MW [kDa]	Possible Coverage [%]	Coverage [%]	Spectrum Counting	Confidently Localized Modification Sites	# Confidently Localized Modification Sites	Ambiguously Localized Modification Sites	#Ambiguously Localized Modification Sites	Protein Inference	Secondary Accessions	Protein Group	#Validated Peptides	#Peptides	#Unique	#Validated Unique	#Unique to Group	#Validated Unique to Group	#Validated PSMs	#PSMs	Confidence [%]
TRYP_PIG	24.3938	68.4	61.9	25894.4	Deamidation of N(N18, N62, N74, N85, N91, N105, N222); Deamidation of Q(Q163, Q225, Q226); Oxidation of M(M94, M168)	Deamidation of N(7); Deamidation of Q(3); Oxidation of M(2)	Deamidation of N (N83-{N83})	Deamidation of N (1)	Single Protein		TRYP_PIG	71	88	88	71	88	71	949	1114	100
K2C1_HUMAN	65.8469	65.16	57.23	990.558	Deamidation of N(N225, N274, N278, N281, N444, N499); Deamidation of Q(Q215, Q216); Oxidation of M(M258, M261, M295, M468, M492)	Deamidation of N(6); Deamidation of Q(2); Oxidation of M(5)	Deamidation of N (N187-{N187 N188 Q189}, N235-{N235 N236}), Deamidation of Q (Q202-{Q202 Q203 N204 Q205 Q208})	Deamidation of N (2), Deamidation of Q (1)	Single Protein		K2C1_HUMAN	74	105	94	67	94	67	413	519	100
K22E_HUMAN	65.8254	79.07	78.76	397.827	Deamidation of N(N257, N286, N348, N425, N449); Deamidation of Q(Q256, Q551); Oxidation of M(M263, M300, M343, M473, M497)	Deamidation of N(5); Deamidation of Q(2); Oxidation of M(5)	Deamidation of Q (Q207-{Q207 Q208 N209 Q210 Q213})	Deamidation of Q (1)	Single Protein		K22E_HUMAN	70	108	96	63	96	63	326	421	100
K1C10_HUMAN	59.4829	61.72	58.35	777.343	Deamidation of N(N240, N253, N286, N307, N353, N354, N444); Deamidation of Q(Q447); Oxidation of M(M150, M271, M306, M321)	Deamidation of N(7); Deamidation of Q(1); Oxidation of M(4)	Deamidation of Q (Q151-{Q151 N152 N154}, Q428-{Q428 N429 Q433 Q434})	Deamidation of Q (2)	Single Protein		K1C10_HUMAN	67	95	85	60	85	60	369	461	100
OON20372.1 C2 domain protein, partial [Opisthorchis viverrini]	190.26	80.63	38.56	77.2961	Deamidation of N(N1031, N1306); Oxidation of M(M295, M1008, M1141, M1143, M1230, M1376)	Deamidation of N(2); Oxidation of M(6)	Deamidation of N (N1417-{N1417 Q1419}), Deamidation of Q (Q260-{Q260 N265 Q273}, Q941-{Q941 N944})	Deamidation of N (1), Deamidation of Q (2)	Single Protein		OON20372.1 C2 domain protein, partial [Opisthorchis viverrini]	61	94	92	59	92	59	121	183	100
K1C9_HUMAN	62.0919	63.72	56.5	639.861	Deamidation of N(N258); Deamidation of Q(Q5, Q172, Q251, Q262); Oxidation of M(M157, M245, M269, M276, M286, M296, M326, M411)	Deamidation of N(1); Deamidation of Q(4); Oxidation of M(8)	Deamidation of N (N222-{N200 N206 Q214 N222 N223}, N303-{N291 Q298 Q302 N303 N308 N312}), Deamidation of Q (Q462-{N456 Q462})	Deamidation of N (2), Deamidation of Q (1)	Single Protein		K1C9_HUMAN	55	82	82	55	82	55	213	257	100
OON21719.1 ATP:guanido phosphotransferase, catalytic domain protein [Opisthorchis viverrini]	80.458	100	52.71	156.798	Deamidation of N(N205, N417); Oxidation of M(M116, M502)	Deamidation of N(2); Oxidation of M(2)			Single Protein		OON21719.1 ATP:guanido phosphotransferase, catalytic domain protein [Opisthorchis viverrini]	32	47	47	32	47	32	69	99	100
OON20336.1 Annexin, partial [Opisthorchis viverrini]	38.7558	100	69.41	414.671	Deamidation of N(N37, N70, N184, N192); Oxidation of M(M122, M149, M161, M266, M283, M311)	Deamidation of N(4); Oxidation of M(6)			Single Protein		OON20336.1 Annexin, partial [Opisthorchis viverrini]	29	38	38	29	38	29	72	94	100
OON17288.1 hypothetical protein X801_06875 [Opisthorchis viverrini]	75.8226	63.98	35.72	216.9	Deamidation of N(N133); Oxidation of M(M104, M552)	Deamidation of N(1); Oxidation of M(2)			Single Protein		OON17288.1 hypothetical protein X801_06875 [Opisthorchis viverrini]	25	41	41	25	41	25	61	88	100
ALBU_BOVIN	69.2484	100	45.96	290.866	Deamidation of Q(Q440); Oxidation of M(M469)	Deamidation of Q(1); Oxidation of M(1)	Deamidation of N (N428-{Q427 N428})	Deamidation of N (1)	Single Protein		ALBU_BOVIN	29	44	36	23	36	23	115	158	100
OON14610.1 calpain family cysteine protease, partial [Opisthorchis viverrini]	63.9224	81.67	44.84	254.16	Deamidation of N(N533); Deamidation of Q(Q538); Oxidation of M(M145, M207, M208, M385, M540)	Deamidation of N(1); Deamidation of Q(1); Oxidation of M(5)			Single Protein		OON14610.1 calpain family cysteine protease, partial [Opisthorchis viverrini]	23	38	38	23	38	23	53	82	100
OON19129.1 ferritin-like protein [Opisthorchis viverrini]	20.204	83.82	66.47	1389.56	Deamidation of N(N155, N158); Deamidation of Q(Q94); Oxidation of M(M97, M103, M114)	Deamidation of N(2); Deamidation of Q(1); Oxidation of M(3)	Deamidation of N (N71-{Q70 N71 Q72})	Deamidation of N (1)	Single Protein		OON19129.1 ferritin-like protein [Opisthorchis viverrini]	21	26	26	21	26	21	79	92	100
OON14960.1 Annexin [Opisthorchis viverrini]	39.2006	90.11	55.08	243.929	Oxidation of M(M41, M93, M204, M257)	Oxidation of M(4)			Single Protein		OON14960.1 Annexin [Opisthorchis viverrini]	19	24	24	19	24	19	34	43	100
OON21126.1 sodium/potassium-transporting ATPase subunit alpha-1, partial [Opisthorchis viverrini]	120.706	70	19.08	41.9963	Deamidation of N(N52, N69)	Deamidation of N(2)			Single Protein		OON21126.1 sodium/potassium-transporting ATPase subunit alpha-1, partial [Opisthorchis viverrini]	17	33	33	17	33	17	21	51	100
OON21579.1 BRO1-like domain protein [Opisthorchis viverrini]	103.553	84.33	20.17	53.0725					Single Protein		OON21579.1 BRO1-like domain protein [Opisthorchis viverrini]	17	34	34	17	34	17	28	49	100
ALBU_HUMAN	69.3215	95.57	35.3	159.341	Deamidation of Q(Q441); Oxidation of M(M353, M572)	Deamidation of Q(1); Oxidation of M(2)			Single Protein		ALBU_HUMAN	22	40	32	16	32	16	68	101	100
OON17840.1 WD domain, G-beta repeat protein, partial [Opisthorchis viverrini]	142.114	79	14.31	45.0621					Single Protein		OON17840.1 WD domain, G-beta repeat protein, partial [Opisthorchis viverrini]	16	46	46	16	46	16	31	87	100
OON14523.1 putative chaperone protein DnaK, partial [Opisthorchis viverrini]	70.649	81.92	35.7	90.6307	Oxidation of M(M124, M547)	Oxidation of M(2)	Deamidation of N (N353-{Q349 N353 N358})	Deamidation of N (1)	Single Protein		OON14523.1 putative chaperone protein DnaK, partial [Opisthorchis viverrini]	22	37	27	15	37	22	32	55	100
OON22441.1 hypothetical protein X801_01658 [Opisthorchis viverrini]	72.9391	59.91	23.78	80.4816	Oxidation of M(M253, M406)	Oxidation of M(2)			Single Protein		OON22441.1 hypothetical protein X801_01658 [Opisthorchis viverrini]	14	23	23	14	23	14	17	26	100
OON18674.1 Annexin, partial [Opisthorchis viverrini]	48.6422	67.8	28.34	284.785	Deamidation of Q(Q247); Oxidation of M(M239, M369)	Deamidation of Q(1); Oxidation of M(2)			Single Protein		OON18674.1 Annexin, partial [Opisthorchis viverrini]	13	30	30	13	30	13	27	53	100
OON22569.1 glycosyl hydrolase, family 31 [Opisthorchis viverrini]	75.576	81.54	27.18	96.3987					Single Protein		OON22569.1 glycosyl hydrolase, family 31 [Opisthorchis viverrini]	13	16	16	13	16	13	19	27	100
OON15232.1 V-type ATPase subunit family protein [Opisthorchis viverrini]	102.539	61.36	16.79	73.311	Deamidation of N(N353)	Deamidation of N(1)			Single Protein		OON15232.1 V-type ATPase subunit family protein [Opisthorchis viverrini]	12	21	21	12	21	12	19	35	100
OON20003.1 hypothetical protein X801_04120, partial [Opisthorchis viverrini]	78.5798	68.26	18.99	106.72					Single Protein		OON20003.1 hypothetical protein X801_04120, partial [Opisthorchis viverrini]	12	24	24	12	24	12	18	35	100
OON23664.1 PDZ/DHR/GLGF domain protein [Opisthorchis viverrini]	32.5358	66.23	39.07	390.559	Deamidation of N(N246)	Deamidation of N(1)	Deamidation of N (N189-{N188 N189})	Deamidation of N (1)	Single Protein		OON23664.1 PDZ/DHR/GLGF domain protein [Opisthorchis viverrini]	12	18	18	12	18	12	25	35	100
OON22549.1 Tubulin/FtsZ family, GTPase domain protein [Opisthorchis viverrini]	51.8921	72.14	41.47	98.6729	Oxidation of M(M73, M164, M276, M382)	Oxidation of M(4)			Single Protein		OON22549.1 Tubulin/FtsZ family, GTPase domain protein [Opisthorchis viverrini]	17	24	12	11	14	11	21	39	100
OON23972.1 phospholipid-translocating P-type ATPase, flippase, partial [Opisthorchis viverrini]	120.166	68.26	11.52	60.6505	Deamidation of Q(Q755)	Deamidation of Q(1)			Single Protein		OON23972.1 phospholipid-translocating P-type ATPase, flippase, partial [Opisthorchis viverrini]	11	27	27	11	27	11	20	37	100
OON14959.1 Annexin [Opisthorchis viverrini]	43.0853	86.67	30.26	84.1567	Oxidation of M(M61)	Oxidation of M(1)			Single Protein		OON14959.1 Annexin [Opisthorchis viverrini]	10	16	16	10	16	10	13	29	100
OON14987.1 14-3-3 protein [Opisthorchis viverrini]	28.9844	100	40	347.324	Oxidation of M(M79, M99)	Oxidation of M(2)			Single Protein		OON14987.1 14-3-3 protein [Opisthorchis viverrini]	11	17	15	10	15	10	24	37	100
OON17064.1 hypothetical protein X801_07105 [Opisthorchis viverrini]	48.742	66.22	26.4	251.212	Oxidation of M(M58)	Oxidation of M(1)			Single Protein		OON17064.1 hypothetical protein X801_07105 [Opisthorchis viverrini]	10	22	22	10	22	10	31	49	100
OON20100.1 FG-GAP repeat protein [Opisthorchis viverrini]	105.665	62.03	11.51	55.5578			Deamidation of N (N747-{Q741 N747})	Deamidation of N (1)	Single Protein		OON20100.1 FG-GAP repeat protein [Opisthorchis viverrini]	10	14	14	10	14	10	13	18	100
OON23885.1 GDA1/CD39 family protein [Opisthorchis viverrini]	55.7345	61.33	22.85	84.0533					Single Protein		OON23885.1 GDA1/CD39 family protein [Opisthorchis viverrini]	10	20	20	10	20	10	12	20	100
OON13836.1 C2 domain protein, partial [Opisthorchis viverrini]	55.3395	93.27	21.22	243.658					Single Protein		OON13836.1 C2 domain protein, partial [Opisthorchis viverrini]	9	14	14	9	14	9	27	37	100
OON20109.1 trypsin [Opisthorchis viverrini]	63.5529	70.25	21.48	57.1975					Single Protein		OON20109.1 trypsin [Opisthorchis viverrini]	9	16	16	9	16	9	9	18	100
OON21493.1 EF hand [Opisthorchis viverrini]	22.657	84.62	42.05	192.628	Oxidation of M(M111, M175)	Oxidation of M(2)			Single Protein		OON21493.1 EF hand [Opisthorchis viverrini]	9	10	10	9	10	9	13	17	100
OON23425.1 Ezrin/radixin/moesin family protein [Opisthorchis viverrini]	25.2217	100	43.4	153.663	Oxidation of M(M12, M146)	Oxidation of M(2)			Single Protein		OON23425.1 Ezrin/radixin/moesin family protein [Opisthorchis viverrini]	9	14	14	9	14	9	11	17	100
REF_HEVBR	14.7127	100	53.62	1065.47	Deamidation of N(N73); Deamidation of Q(Q47)	Deamidation of N(1); Deamidation of Q(1)			Single Protein		REF_HEVBR	9	9	9	9	9	9	52	65	100
OON18575.1 oxidoreductase, short chain dehydrogenase/reductase family protein, partial [Opisthorchis viverrini]	37.3001	59.59	26.84	281.035	Oxidation of M(M42)	Oxidation of M(1)			Single Protein		OON18575.1 oxidoreductase, short chain dehydrogenase/reductase family protein, partial [Opisthorchis viverrini]	8	20	20	8	20	8	14	29	100
OON14711.1 galactoside-binding lectin [Opisthorchis viverrini]	136.767	77.43	7.23	26.0082					Single Protein		OON14711.1 galactoside-binding lectin [Opisthorchis viverrini]	7	28	28	7	28	7	9	35	100
OON14937.1 Hsp90 protein [Opisthorchis viverrini]	82.0075	90.78	15.36	105.947					Single Protein		OON14937.1 Hsp90 protein [Opisthorchis viverrini]	8	21	20	7	21	8	13	31	100
OON15196.1 Ras family protein, partial [Opisthorchis viverrini]	22.5917	100	41.92	128.147	Oxidation of M(M1)	Oxidation of M(1)			Single Protein		OON15196.1 Ras family protein, partial [Opisthorchis viverrini]	7	15	15	7	15	7	8	19	100
OON16906.1 Ras family protein [Opisthorchis viverrini]	24.3872	87.61	38.53	198.686	Oxidation of M(M197)	Oxidation of M(1)			Single Protein		OON16906.1 Ras family protein [Opisthorchis viverrini]	7	8	8	7	8	7	10	14	100
OON18060.1 FerI domain protein [Opisthorchis viverrini]	19.3249	79.19	30.64	604.254	Oxidation of M(M140)	Oxidation of M(1)			Single Protein		OON18060.1 FerI domain protein [Opisthorchis viverrini]	7	12	12	7	12	7	24	34	100
OON18961.1 gelsolin repeat protein [Opisthorchis viverrini]	40.9136	100	25.42	76.9488					Single Protein		OON18961.1 gelsolin repeat protein [Opisthorchis viverrini]	8	13	12	7	13	8	9	19	100
OON22233.1 14-3-3 protein [Opisthorchis viverrini]	25.4868	100	37.44	163.506					Single Protein		OON22233.1 14-3-3 protein [Opisthorchis viverrini]	8	13	12	7	12	7	10	23	100
OON23370.1 Tubulin/FtsZ family, GTPase domain protein [Opisthorchis viverrini]	58.1966	73.66	19.85	118.65	Deamidation of N(N176)	Deamidation of N(1)			Single Protein		OON23370.1 Tubulin/FtsZ family, GTPase domain protein [Opisthorchis viverrini]	8	14	13	7	13	7	14	21	100
CAS1_BOVIN	24.5134	80.37	31.31	499.718	Oxidation of M(M150)	Oxidation of M(1)	Deamidation of Q (Q28-{Q24 Q28 N32 N34})	Deamidation of Q (1)	Single Protein		CAS1_BOVIN	6	11	11	6	11	6	17	22	100
HBA_HUMAN	15.1169	59.57	56.74	239.439					Single Protein		HBA_HUMAN	6	7	7	6	7	6	7	14	100
HBB_HUMAN	15.8572	100	36.3	197.726	Oxidation of M(M55)	Oxidation of M(1)			Single Protein		HBB_HUMAN	6	9	9	6	9	6	8	11	100
OON13593.1 tetraspanin family protein, partial [Opisthorchis viverrini]	22.6176	54.95	26.73	280.564	Deamidation of Q(Q172)	Deamidation of Q(1)			Single Protein		OON13593.1 tetraspanin family protein, partial [Opisthorchis viverrini]	6	8	8	6	8	6	12	20	100
OON14666.1 Lysosome-associated membrane glycoprotein [Opisthorchis viverrini]	31.785	41.52	23.53	137.001	Oxidation of M(M243)	Oxidation of M(1)			Single Protein		OON14666.1 Lysosome-associated membrane glycoprotein [Opisthorchis viverrini]	6	9	9	6	9	6	6	12	100
OON15200.1 putative Cys-rich domain protein [Opisthorchis viverrini]	12.7317	75.89	47.32	527.149	Oxidation of M(M55)	Oxidation of M(1)			Single Protein		OON15200.1 putative Cys-rich domain protein [Opisthorchis viverrini]	6	9	9	6	9	6	11	18	100
OON16001.1 translation elongation factor EF-1, subunit alpha, partial [Opisthorchis viverrini]	54.1051	82.93	16.27	164.406					Single Protein		OON16001.1 translation elongation factor EF-1, subunit alpha, partial [Opisthorchis viverrini]	6	15	15	6	15	6	19	30	100
OON16870.1 tetraspanin family protein [Opisthorchis viverrini]	23.8684	38.12	29.15	598.491	Deamidation of Q(Q141)	Deamidation of Q(1)			Single Protein		OON16870.1 tetraspanin family protein [Opisthorchis viverrini]	6	8	8	6	8	6	17	28	100
OON17486.1 hypothetical protein X801_06676 [Opisthorchis viverrini]	12.7393	100	37.82	875.784	Deamidation of N(N57, N74)	Deamidation of N(2)			Single Protein		OON17486.1 hypothetical protein X801_06676 [Opisthorchis viverrini]	6	10	10	6	10	6	21	24	100
OON18327.1 glutathione S-transferase protein [Opisthorchis viverrini]	24.6275	100	34.91	240.028	Oxidation of M(M85, M86, M129)	Oxidation of M(3)			Single Protein		OON18327.1 glutathione S-transferase protein [Opisthorchis viverrini]	6	14	14	6	14	6	11	19	100
OON18471.1 hypothetical protein X801_05675 [Opisthorchis viverrini]	48.567	75.81	16.13	67.3458					Single Protein		OON18471.1 hypothetical protein X801_05675 [Opisthorchis viverrini]	6	10	10	6	10	6	6	10	100
OON20442.1 phospholipase D domain protein [Opisthorchis viverrini]	104.575	87.8	8.5	41.3403					Single Protein		OON20442.1 phospholipase D domain protein [Opisthorchis viverrini]	6	21	21	6	21	6	11	25	100
OON21078.1 14-3-3 protein [Opisthorchis viverrini]	28.1603	100	31.45	152.793					Single Protein		OON21078.1 14-3-3 protein [Opisthorchis viverrini]	7	11	9	6	9	6	11	19	100
OON21587.1 hypothetical protein X801_02515 [Opisthorchis viverrini]	40.2969	48.09	21.04	247.424					Single Protein		OON21587.1 hypothetical protein X801_02515 [Opisthorchis viverrini]	6	11	11	6	11	6	8	19	100
OON13414.1 ATP synthase alpha/beta family, nucleotide-binding domain protein [Opisthorchis viverrini]	48.1114	83.03	15.6	61.7241					Single Protein		OON13414.1 ATP synthase alpha/beta family, nucleotide-binding domain protein [Opisthorchis viverrini]	5	10	10	5	10	5	5	11	100
OON14450.1 tetraspanin family protein [Opisthorchis viverrini]	17.9763	41.21	21.82	1642.85					Single Protein		OON14450.1 tetraspanin family protein [Opisthorchis viverrini]	5	6	6	5	6	5	33	41	100
OON16141.1 hypothetical protein X801_08048 [Opisthorchis viverrini]	29.365	79.1	19.4	150.316					Single Protein		OON16141.1 hypothetical protein X801_08048 [Opisthorchis viverrini]	5	9	9	5	9	5	8	16	100
OON16509.1 glutathione S-transferase protein [Opisthorchis viverrini]	24.3834	100	28.17	171.902	Oxidation of M(M53, M74)	Oxidation of M(2)			Single Protein		OON16509.1 glutathione S-transferase protein [Opisthorchis viverrini]	6	12	8	5	12	6	9	16	100
OON18644.1 hypothetical protein X801_05499, partial [Opisthorchis viverrini]	14.5372	100	25	602.69	Oxidation of M(M99)	Oxidation of M(1)			Single Protein		OON18644.1 hypothetical protein X801_05499, partial [Opisthorchis viverrini]	5	12	12	5	12	5	15	24	100
OON19532.1 Innexin [Opisthorchis viverrini]	52.0718	57.55	12.69	196.538					Single Protein		OON19532.1 Innexin [Opisthorchis viverrini]	5	5	5	5	5	5	11	11	100
OON20258.1 Actin [Opisthorchis viverrini]	41.6448	76.86	42.29	254.709	Deamidation of N(N112); Oxidation of M(M191, M326)	Deamidation of N(1); Oxidation of M(2)			Single Protein		OON20258.1 Actin [Opisthorchis viverrini]	18	26	9	5	26	18	62	92	100
OON22593.1 Amidase [Opisthorchis viverrini]	60.5346	56.42	11.75	106.928	Deamidation of N(N366); Oxidation of M(M408)	Deamidation of N(1); Oxidation of M(1)			Single Protein		OON22593.1 Amidase [Opisthorchis viverrini]	5	13	13	5	13	5	9	20	100
TRFL_HUMAN	78.1319	88.03	9.72	83.6482					Single Protein		TRFL_HUMAN	6	26	25	5	26	6	13	34	100
AMYS_HUMAN	57.7309	76.32	13.11	45.7107					Single Protein		AMYS_HUMAN	4	12	12	4	12	4	6	12	100
CAS2_BOVIN	26.0023	100	18.47	312.233					Single Protein		CAS2_BOVIN	4	8	8	4	8	4	11	17	100
CASK_BOVIN	21.2559	38.95	25.79	391.75	Oxidation of M(M116)	Oxidation of M(1)			Single Protein		CASK_BOVIN	4	6	6	4	6	4	6	15	100
OON14048.1 EGF-like domain protein, partial [Opisthorchis viverrini]	67.9746	71.36	9.55	53.7869					Single Protein		OON14048.1 EGF-like domain protein, partial [Opisthorchis viverrini]	4	13	13	4	13	4	5	16	100
OON14063.1 hypothetical protein X801_10150, partial [Opisthorchis viverrini]	17.6254	61.01	21.38	476.24	Deamidation of Q(Q60)	Deamidation of Q(1)			Single Protein		OON14063.1 hypothetical protein X801_10150, partial [Opisthorchis viverrini]	4	7	7	4	7	4	10	13	100
OON14177.1 tetraspanin family protein, partial [Opisthorchis viverrini]	14.4495	78.03	30.3	895.792					Single Protein		OON14177.1 tetraspanin family protein, partial [Opisthorchis viverrini]	4	8	8	4	8	4	23	30	100
OON14354.1 putative multicatalytic endopeptidase [Opisthorchis viverrini]	33.0548	80.92	13.82	67.0625					Single Protein		OON14354.1 putative multicatalytic endopeptidase [Opisthorchis viverrini]	4	11	11	4	11	4	6	12	100
OON14597.1 Ras family protein, partial [Opisthorchis viverrini]	12.3015	100	42.34	183.667					Single Protein		OON14597.1 Ras family protein, partial [Opisthorchis viverrini]	4	4	4	4	4	4	4	4	100
OON15642.1 Ras family protein [Opisthorchis viverrini]	20.9529	57.45	23.4	218.643					Single Protein		OON15642.1 Ras family protein [Opisthorchis viverrini]	4	6	6	4	6	4	5	7	100
OON15731.1 SOUL heme-binding protein, partial [Opisthorchis viverrini]	20.1037	100	26.01	117.844					Single Protein		OON15731.1 SOUL heme-binding protein, partial [Opisthorchis viverrini]	4	12	12	4	12	4	7	15	100
OON15904.1 peptidyl-prolyl cis-trans isomerase, cyclophilin-type [Opisthorchis viverrini]	18.315	79.76	20.24	298.198	Oxidation of M(M48)	Oxidation of M(1)			Single Protein		OON15904.1 peptidyl-prolyl cis-trans isomerase, cyclophilin-type [Opisthorchis viverrini]	4	8	8	4	8	4	6	11	100
OON16101.1 antioxidant, AhpC/TSA family [Opisthorchis viverrini]	23.5549	67.45	19.81	202.691					Single Protein		OON16101.1 antioxidant, AhpC/TSA family [Opisthorchis viverrini]	4	6	6	4	6	4	6	10	100
OON17572.1 hypothetical protein X801_06589, partial [Opisthorchis viverrini]	77.8724	71.16	8.05	49.2785					Single Protein		OON17572.1 hypothetical protein X801_06589, partial [Opisthorchis viverrini]	4	14	14	4	14	4	6	22	100
OON17828.1 hypothetical protein X801_06328 [Opisthorchis viverrini]	16.8362	81.82	36.36	132.383	Deamidation of N(N41)	Deamidation of N(1)			Single Protein		OON17828.1 hypothetical protein X801_06328 [Opisthorchis viverrini]	4	7	7	4	7	4	4	8	100
OON18455.1 glutathione S-transferase protein, partial [Opisthorchis viverrini]	23.812	100	23.79	193.973	Oxidation of M(M82)	Oxidation of M(1)			Single Protein		OON18455.1 glutathione S-transferase protein, partial [Opisthorchis viverrini]	4	7	7	4	7	4	8	16	100
OON18566.1 FerB domain protein [Opisthorchis viverrini]	32.1579	100	17.41	87.5885					Single Protein		OON18566.1 FerB domain protein [Opisthorchis viverrini]	4	10	10	4	10	4	6	11	100
OON20316.1 WW domain protein, partial [Opisthorchis viverrini]	81.4247	77.45	6.86	36.8662					Single Protein		OON20316.1 WW domain protein, partial [Opisthorchis viverrini]	4	10	9	4	10	4	4	12	100
OON21481.1 hypothetical protein X801_02621 [Opisthorchis viverrini]	17.0596	77.12	26.8	172.771					Single Protein		OON21481.1 hypothetical protein X801_02621 [Opisthorchis viverrini]	4	4	4	4	4	4	4	4	100
OON21665.1 malate dehydrogenase, NAD-dependent [Opisthorchis viverrini]	36.2237	86.63	16.41	123.037					Single Protein		OON21665.1 malate dehydrogenase, NAD-dependent [Opisthorchis viverrini]	4	16	16	4	16	4	8	22	100
OON21824.1 ABC transporter, ATP-binding protein [Opisthorchis viverrini]	22.8749	100	16.91	145.762	Deamidation of N(N76)	Deamidation of N(1)			Single Protein		OON21824.1 ABC transporter, ATP-binding protein [Opisthorchis viverrini]	4	7	7	4	7	4	5	9	100
OON23371.1 Tubulin/FtsZ family, GTPase domain protein [Opisthorchis viverrini]	52.6838	70.95	14.95	65.3351					Single Protein		OON23371.1 Tubulin/FtsZ family, GTPase domain protein [Opisthorchis viverrini]	5	10	9	4	9	4	5	15	100
OON23676.1 multicatalytic endopeptidase [Opisthorchis viverrini]	27.6999	62.5	19.35	110.2					Single Protein		OON23676.1 multicatalytic endopeptidase [Opisthorchis viverrini]	4	5	5	4	5	4	5	6	100
OON23758.1 Tubulin/FtsZ family, GTPase domain protein [Opisthorchis viverrini]	49.6699	60.27	28.67	108.204	Oxidation of M(M73, M257)	Oxidation of M(2)			Single Protein		OON23758.1 Tubulin/FtsZ family, GTPase domain protein [Opisthorchis viverrini]	10	18	7	4	8	4	14	33	100
ALDOA_RABIT	38.8331	76.39	9.17	49.8349					Single Protein		ALDOA_RABIT	3	13	13	3	13	3	3	13	100
BGAL_ECOLI	116.409	70.02	5.47	58.9748	Oxidation of M(M368, M373, M380)	Oxidation of M(3)			Single Protein		BGAL_ECOLI	3	22	22	3	22	3	7	28	100
OON13845.1 hypothetical protein X801_10373, partial [Opisthorchis viverrini]	43.5741	91.24	8.25	78.3229	Oxidation of M(M155)	Oxidation of M(1)			Single Protein		OON13845.1 hypothetical protein X801_10373, partial [Opisthorchis viverrini]	3	5	5	3	5	3	4	6	100
OON14109.1 AMP-binding enzyme [Opisthorchis viverrini]	75.053	79.79	3.92	73.0716					Single Protein		OON14109.1 AMP-binding enzyme [Opisthorchis viverrini]	3	9	9	3	9	3	6	14	99.308
OON14441.1 FG-GAP repeat protein, partial [Opisthorchis viverrini]	127.424	60.48	3.68	32.6961					Single Protein		OON14441.1 FG-GAP repeat protein, partial [Opisthorchis viverrini]	3	19	19	3	19	3	6	25	100
OON14685.1 hypothetical protein X801_09523 [Opisthorchis viverrini]	23.5415	37.79	20.28	164.592					Single Protein		OON14685.1 hypothetical protein X801_09523 [Opisthorchis viverrini]	3	6	6	3	6	3	3	6	100
OON15255.1 Ras family protein, partial [Opisthorchis viverrini]	22.9023	85.85	19.02	165.085					Single Protein		OON15255.1 Ras family protein, partial [Opisthorchis viverrini]	4	10	9	3	9	3	9	19	100
OON15341.1 DnaJ domain protein [Opisthorchis viverrini]	45.1527	93.05	13.4	44.5175					Single Protein		OON15341.1 DnaJ domain protein [Opisthorchis viverrini]	3	9	9	3	9	3	3	9	100
OON15686.1 ferritin-like protein [Opisthorchis viverrini]	18.5373	80.37	16.56	211.651	Oxidation of M(M77)	Oxidation of M(1)			Single Protein		OON15686.1 ferritin-like protein [Opisthorchis viverrini]	3	4	4	3	4	3	5	6	100
OON16325.1 hypothetical protein X801_07864 [Opisthorchis viverrini]	19.1498	100	32.12	108.731					Single Protein		OON16325.1 hypothetical protein X801_07864 [Opisthorchis viverrini]	3	4	4	3	4	3	3	6	100
OON16960.1 major Vault Protein repeat-containing domain protein, partial [Opisthorchis viverrini]	22.0294	85.42	13.54	450.213					Single Protein		OON16960.1 major Vault Protein repeat-containing domain protein, partial [Opisthorchis viverrini]	3	6	6	3	6	3	12	24	100
OON16988.1 Ras family protein [Opisthorchis viverrini]	22.8025	100	19.61	207.867					Single Protein		OON16988.1 Ras family protein [Opisthorchis viverrini]	3	6	6	3	6	3	7	9	100
OON17132.1 hypothetical protein X801_07036, partial [Opisthorchis viverrini]	19.6009	65.24	31.02	187.34					Single Protein		OON17132.1 hypothetical protein X801_07036, partial [Opisthorchis viverrini]	3	4	4	3	4	3	5	6	100
OON17206.1 hypothetical protein X801_06958 [Opisthorchis viverrini]	15.5633	100	22.73	210.048					Single Protein		OON17206.1 hypothetical protein X801_06958 [Opisthorchis viverrini]	3	4	4	3	4	3	5	11	100
OON17498.1 putative proteasome subunit alpha [Opisthorchis viverrini]	26.7194	68.03	15.57	92.4771					Single Protein		OON17498.1 putative proteasome subunit alpha [Opisthorchis viverrini]	3	5	5	3	5	3	3	5	100
OON17590.1 SCP-like protein, partial [Opisthorchis viverrini]	33.5463	78.48	17.55	158.82					Single Protein		OON17590.1 SCP-like protein, partial [Opisthorchis viverrini]	3	6	6	3	6	3	8	13	100
OON17736.1 Annexin, partial [Opisthorchis viverrini]	27.6323	39.06	20.31	137.678					Single Protein		OON17736.1 Annexin, partial [Opisthorchis viverrini]	3	5	5	3	5	3	4	6	100
OON17766.1 Aromatic-di-Alanine repeat protein [Opisthorchis viverrini]	33.9187	88.74	10.26	66.9423					Single Protein		OON17766.1 Aromatic-di-Alanine repeat protein [Opisthorchis viverrini]	3	5	5	3	5	3	3	5	100
OON18075.1 hypothetical protein X801_06077 [Opisthorchis viverrini]	20.5969	82.81	22.4	194.894					Single Protein		OON18075.1 hypothetical protein X801_06077 [Opisthorchis viverrini]	3	3	3	3	3	3	5	5	100
OON18177.1 cyclin ccl1, partial [Opisthorchis viverrini]	53.9285	53.5	7.43	64.5343					Single Protein		OON18177.1 cyclin ccl1, partial [Opisthorchis viverrini]	3	7	7	3	7	3	3	10	100
OON18363.1 Ras family protein, partial [Opisthorchis viverrini]	15.2919	100	23.91	200.915					Single Protein		OON18363.1 Ras family protein, partial [Opisthorchis viverrini]	3	5	5	3	5	3	4	9	100
OON18938.1 peptidase, T1 family, partial [Opisthorchis viverrini]	25.3087	83.77	14.04	93.9296					Single Protein		OON18938.1 peptidase, T1 family, partial [Opisthorchis viverrini]	3	4	4	3	4	3	3	4	100
OON19150.1 hypothetical protein X801_04986, partial [Opisthorchis viverrini]	62.0169	72.69	7.01	47.8688					Single Protein		OON19150.1 hypothetical protein X801_04986, partial [Opisthorchis viverrini]	3	13	13	3	13	3	5	16	100
OON19640.1 hypothetical protein X801_04492, partial [Opisthorchis viverrini]	46.7673	51.52	7.93	169.738					Single Protein		OON19640.1 hypothetical protein X801_04492, partial [Opisthorchis viverrini]	3	4	4	3	4	3	6	8	100
OON20186.1 glyceraldehyde-3-phosphate dehydrogenase, type I [Opisthorchis viverrini]	36.3324	91.99	13.06	105.504					Single Protein		OON20186.1 glyceraldehyde-3-phosphate dehydrogenase, type I [Opisthorchis viverrini]	4	12	10	3	12	4	9	19	100
OON20717.1 Scramblase, partial [Opisthorchis viverrini]	21.1045	84.7	18.03	98.0358					Single Protein		OON20717.1 Scramblase, partial [Opisthorchis viverrini]	3	4	4	3	4	3	3	6	100
OON20725.1 WD domain, G-beta repeat protein, partial [Opisthorchis viverrini]	39.6426	72.35	9.22	69.2685					Single Protein		OON20725.1 WD domain, G-beta repeat protein, partial [Opisthorchis viverrini]	3	6	6	3	6	3	3	6	100
OON22036.1 hypothetical protein X801_02062 [Opisthorchis viverrini]	9.20851	69.05	57.14	388.324	Deamidation of N(N67)	Deamidation of N(1)			Single Protein		OON22036.1 hypothetical protein X801_02062 [Opisthorchis viverrini]	3	4	4	3	4	3	5	6	100
OON22327.1 amino acid permease, partial [Opisthorchis viverrini]	81.1388	42.42	3.72	86.6329					Single Protein		OON22327.1 amino acid permease, partial [Opisthorchis viverrini]	3	12	12	3	12	3	7	20	100
OON22896.1 IC domain protein, HAD ATPase, P-type family [Opisthorchis viverrini]	44.8791	76.05	13.09	59.0436					Single Protein		OON22896.1 IC domain protein, HAD ATPase, P-type family [Opisthorchis viverrini]	4	7	5	3	7	4	4	14	100
OON23245.1 dynein light chain type 1 [Opisthorchis viverrini]	10.3131	100	43.82	201.579	Oxidation of M(M13, M17)	Oxidation of M(2)			Single Protein		OON23245.1 dynein light chain type 1 [Opisthorchis viverrini]	3	5	5	3	5	3	4	5	100
OON23247.1 dynein light chain type 1 [Opisthorchis viverrini]	10.4722	100	16.85	256.555					Single Protein		OON23247.1 dynein light chain type 1 [Opisthorchis viverrini]	3	3	3	3	3	3	4	4	100
OON23325.1 dynamin family protein [Opisthorchis viverrini]	67.0476	89.95	5.79	32.3253					Single Protein		OON23325.1 dynamin family protein [Opisthorchis viverrini]	3	10	10	3	10	3	3	11	100
OON23426.1 hypothetical protein X801_00658 [Opisthorchis viverrini]	9.54983	51.81	55.42	417.222	Deamidation of Q(Q4)	Deamidation of Q(1)			Single Protein		OON23426.1 hypothetical protein X801_00658 [Opisthorchis viverrini]	3	3	3	3	3	3	3	3	100
OON23665.1 PDZ/DHR/GLGF domain protein [Opisthorchis viverrini]	30.5265	58.72	12.46	192.37	Deamidation of N(N198)	Deamidation of N(1)			Single Protein		OON23665.1 PDZ/DHR/GLGF domain protein [Opisthorchis viverrini]	3	5	5	3	5	3	5	8	100
OON23734.1 hypothetical protein X801_00351, partial [Opisthorchis viverrini]	27.3	100	14.71	75.3805					Single Protein		OON23734.1 hypothetical protein X801_00351, partial [Opisthorchis viverrini]	3	4	4	3	4	3	3	4	100
KCRM_HUMAN	43.0739	75.33	7.35	43.1724					Single Protein		KCRM_HUMAN	2	6	6	2	6	2	2	6	100
LALBA_BOVIN	16.2359	70.42	21.83	146.786	Oxidation of M(M109)	Oxidation of M(1)			Single Protein		LALBA_BOVIN	2	3	3	2	3	2	3	3	100
LYSC_HUMAN	16.5263	81.08	13.51	363.66					Single Protein		LYSC_HUMAN	2	4	4	2	4	2	8	12	100
MYG_HORSE	17.072	100	19.48	413.035	Oxidation of M(M132)	Oxidation of M(1)			Single Protein		MYG_HORSE	2	7	5	2	7	2	10	20	100
OON13365.1 hypothetical protein X801_10862, partial [Opisthorchis viverrini]	11.3004	100	18.63	143.908					Single Protein		OON13365.1 hypothetical protein X801_10862, partial [Opisthorchis viverrini]	2	8	8	2	8	2	3	9	100
OON13413.1 ATP synthase [Opisthorchis viverrini]	12.0381	73.33	30.48	139.796					Single Protein		OON13413.1 ATP synthase [Opisthorchis viverrini]	2	2	2	2	2	2	2	2	100
OON13527.1 DnaJ domain protein [Opisthorchis viverrini]	13.2396	100	22.32	174.746					Single Protein		OON13527.1 DnaJ domain protein [Opisthorchis viverrini]	2	3	3	2	3	2	3	4	100
OON13917.1 TBC domain protein [Opisthorchis viverrini]	40.3027	81.77	3.13	46.3048	Oxidation of M(M115)	Oxidation of M(1)			Single Protein		OON13917.1 TBC domain protein [Opisthorchis viverrini]	2	2	2	2	2	2	2	3	100
OON14336.1 hypothetical protein X801_09873, partial [Opisthorchis viverrini]	7.05054	100	38.71	552.422	Oxidation of M(M32)	Oxidation of M(1)			Single Protein		OON14336.1 hypothetical protein X801_09873, partial [Opisthorchis viverrini]	2	3	3	2	3	2	4	7	100
OON14338.1 glutathione S-transferase protein, partial [Opisthorchis viverrini]	12.2001	70.09	18.69	195.715					Single Protein		OON14338.1 glutathione S-transferase protein, partial [Opisthorchis viverrini]	2	2	2	2	2	2	2	4	100
OON14538.1 Amidase [Opisthorchis viverrini]	40.7923	63.81	5.63	61.6749					Single Protein		OON14538.1 Amidase [Opisthorchis viverrini]	2	2	2	2	2	2	2	2	100
OON15125.1 triacylglycerol lipase [Opisthorchis viverrini]	92.414	52.22	4.19	30.0176					Single Protein		OON15125.1 triacylglycerol lipase [Opisthorchis viverrini]	2	6	6	2	6	2	2	8	100
OON15223.1 peptidase, T1 family [Opisthorchis viverrini]	26.9262	65.43	11.11	92.3184					Single Protein		OON15223.1 peptidase, T1 family [Opisthorchis viverrini]	2	3	3	2	3	2	2	3	100
OON15426.1 hypothetical protein X801_08772, partial [Opisthorchis viverrini]	7.22758	100	19.05	698.982					Single Protein		OON15426.1 hypothetical protein X801_08772, partial [Opisthorchis viverrini]	2	2	2	2	2	2	5	6	100
OON15515.1 CDC50 family protein, LEM3 family, partial [Opisthorchis viverrini]	34.4865	66.56	5.84	62.9984	Oxidation of M(M43)	Oxidation of M(1)			Single Protein		OON15515.1 CDC50 family protein, LEM3 family, partial [Opisthorchis viverrini]	2	4	4	2	4	2	3	4	100
OON15699.1 ABC transporter, ATP-binding protein, partial [Opisthorchis viverrini]	112.462	76.23	3.45	24.495					Single Protein		OON15699.1 ABC transporter, ATP-binding protein, partial [Opisthorchis viverrini]	3	19	14	2	17	2	5	21	100
OON15995.1 core histone H2A/H2B/H3/H4, partial [Opisthorchis viverrini]	11.3034	100	39.22	831.469					Single Protein		OON15995.1 core histone H2A/H2B/H3/H4, partial [Opisthorchis viverrini]	4	9	7	2	9	4	15	23	100
OON16261.1 hypothetical protein X801_07928 [Opisthorchis viverrini]	23.7622	87.02	12.02	70.5703					Single Protein		OON16261.1 hypothetical protein X801_07928 [Opisthorchis viverrini]	2	2	2	2	2	2	2	2	100
OON16271.1 CD36 family protein, partial [Opisthorchis viverrini]	33.7336	63.73	8.14	78.0778					Single Protein		OON16271.1 CD36 family protein, partial [Opisthorchis viverrini]	2	4	4	2	4	2	2	4	100
OON16442.1 tetratricopeptide repeat protein [Opisthorchis viverrini]	22.328	100	12.95	76.0551					Single Protein		OON16442.1 tetratricopeptide repeat protein [Opisthorchis viverrini]	2	7	7	2	7	2	3	8	100
OON17499.1 Ras family protein, partial [Opisthorchis viverrini]	14.6443	100	14.84	191.128					Single Protein		OON17499.1 Ras family protein, partial [Opisthorchis viverrini]	2	2	2	2	2	2	3	3	100
OON17511.1 type I phosphodiesterase / nucleotide pyrophosphatase, partial [Opisthorchis viverrini]	61.1701	50	4.12	49.423			Deamidation of N (N451-{N450 N451 N453})	Deamidation of N (1)	Single Protein		OON17511.1 type I phosphodiesterase / nucleotide pyrophosphatase, partial [Opisthorchis viverrini]	2	4	4	2	4	2	2	4	100
OON17530.1 hypothetical protein X801_06633, partial [Opisthorchis viverrini]	10.2253	100	33.33	163.096			Deamidation of N (N54-{N42 N54 Q56})	Deamidation of N (1)	Single Protein		OON17530.1 hypothetical protein X801_06633, partial [Opisthorchis viverrini]	2	2	2	2	2	2	2	2	100
OON17564.1 hypothetical protein X801_06597 [Opisthorchis viverrini]	10.7585	100	16.13	263.058	Oxidation of M(M92)	Oxidation of M(1)			Single Protein		OON17564.1 hypothetical protein X801_06597 [Opisthorchis viverrini]	2	4	4	2	4	2	3	5	100
OON17610.1 hypothetical protein X801_06550, partial [Opisthorchis viverrini]	12.6405	68.75	18.75	190.632					Single Protein		OON17610.1 hypothetical protein X801_06550, partial [Opisthorchis viverrini]	2	3	3	2	3	2	3	3	100
OON18048.1 SNARE domain protein, partial [Opisthorchis viverrini]	21.681	84.66	14.81	77.6647					Single Protein		OON18048.1 SNARE domain protein, partial [Opisthorchis viverrini]	2	3	3	2	3	2	2	3	100
OON18086.1 RHO protein GDP dissociation inhibitor [Opisthorchis viverrini]	16.7671	54.05	18.24	183.483					Single Protein		OON18086.1 RHO protein GDP dissociation inhibitor [Opisthorchis viverrini]	2	4	4	2	4	2	2	5	100
OON18118.1 inorganic diphosphatase, partial [Opisthorchis viverrini]	24.9415	73.39	13.76	78.9174			Deamidation of N (N201-{N196 N201})	Deamidation of N (1)	Single Protein		OON18118.1 inorganic diphosphatase, partial [Opisthorchis viverrini]	2	3	3	2	3	2	2	3	100
OON18408.1 copper/zinc superoxide dismutase [Opisthorchis viverrini]	23.483	87.16	8.26	134.666					Single Protein		OON18408.1 copper/zinc superoxide dismutase [Opisthorchis viverrini]	2	4	4	2	4	2	4	7	100
OON18431.1 ATP synthase [Opisthorchis viverrini]	45.2568	90.82	7.2	40.1055	Deamidation of N(N289)	Deamidation of N(1)			Single Protein		OON18431.1 ATP synthase [Opisthorchis viverrini]	2	4	4	2	4	2	2	4	100
OON18564.1 C2 domain protein [Opisthorchis viverrini]	13.5659	74.79	19.33	123.35					Single Protein		OON18564.1 C2 domain protein [Opisthorchis viverrini]	2	5	5	2	5	2	2	6	100
OON18662.1 fructose-bisphosphate aldolase class-I [Opisthorchis viverrini]	33.7311	60	9.68	101.512					Single Protein		OON18662.1 fructose-bisphosphate aldolase class-I [Opisthorchis viverrini]	2	4	4	2	4	2	4	6	100
OON18956.1 peptidase, T1 family, partial [Opisthorchis viverrini]	27.1536	68.02	8.5	87.3728					Single Protein		OON18956.1 peptidase, T1 family, partial [Opisthorchis viverrini]	2	5	5	2	5	2	2	5	100
OON19114.1 GDA1/CD39 family protein [Opisthorchis viverrini]	56.4799	88.71	4.84	29.594					Single Protein		OON19114.1 GDA1/CD39 family protein [Opisthorchis viverrini]	2	5	5	2	5	2	2	5	100
OON19252.1 p21-Rho-binding domain protein [Opisthorchis viverrini]	10.8043	100	31.91	156.156					Single Protein		OON19252.1 p21-Rho-binding domain protein [Opisthorchis viverrini]	2	4	4	2	4	2	2	5	100
OON19383.1 hypothetical protein X801_04750, partial [Opisthorchis viverrini]	24.5504	67.27	10	83.8779	Oxidation of M(M123)	Oxidation of M(1)			Single Protein		OON19383.1 hypothetical protein X801_04750, partial [Opisthorchis viverrini]	2	5	5	2	5	2	2	5	100
OON19418.1 SNARE domain protein, partial [Opisthorchis viverrini]	19.1645	100	17.86	87.3728					Single Protein		OON19418.1 SNARE domain protein, partial [Opisthorchis viverrini]	2	7	7	2	7	2	2	10	100
OON19494.1 hypothetical protein X801_04637 [Opisthorchis viverrini]	41.7969	59.1	5.8	58.0183					Single Protein		OON19494.1 hypothetical protein X801_04637 [Opisthorchis viverrini]	2	5	5	2	5	2	2	5	100
OON20053.1 hypothetical protein X801_04070 [Opisthorchis viverrini]	44.334	92.89	5.26	51.504					Single Protein		OON20053.1 hypothetical protein X801_04070 [Opisthorchis viverrini]	2	7	7	2	7	2	4	8	100
OON20181.1 transporter, major facilitator family protein, partial [Opisthorchis viverrini]	56.7376	57.86	3.88	35.7144					Single Protein		OON20181.1 transporter, major facilitator family protein, partial [Opisthorchis viverrini]	2	3	3	2	3	2	2	3	100
OON20389.1 phosphoenolpyruvate carboxykinase [Opisthorchis viverrini]	68.9329	77.67	4.21	36.5823					Single Protein		OON20389.1 phosphoenolpyruvate carboxykinase [Opisthorchis viverrini]	2	5	5	2	5	2	3	6	100
OON20748.1 transporter, major facilitator family protein, partial [Opisthorchis viverrini]	69.729	35.48	5.81	71.7197					Single Protein		OON20748.1 transporter, major facilitator family protein, partial [Opisthorchis viverrini]	3	5	4	2	5	3	4	10	100
OON20812.1 putative fumarate hydratase, class II [Opisthorchis viverrini]	53.582	65.59	3.85	64.5498					Single Protein		OON20812.1 putative fumarate hydratase, class II [Opisthorchis viverrini]	2	8	8	2	8	2	3	12	100
OON20848.1 SNF7 family protein [Opisthorchis viverrini]	21.3578	81.87	11.92	92.9027					Single Protein		OON20848.1 SNF7 family protein [Opisthorchis viverrini]	2	6	6	2	6	2	4	6	100
OON21030.1 putative multicatalytic endopeptidase [Opisthorchis viverrini]	29.6413	85.17	8.37	65.5296					Single Protein		OON21030.1 putative multicatalytic endopeptidase [Opisthorchis viverrini]	2	5	5	2	5	2	2	5	100
OON21383.1 ferritin-like protein [Opisthorchis viverrini]	19.8977	68	13.14	139.796					Single Protein		OON21383.1 ferritin-like protein [Opisthorchis viverrini]	2	5	5	2	5	2	3	9	100
OON21405.1 EF hand [Opisthorchis viverrini]	20.5603	100	13.14	139.796					Single Protein		OON21405.1 EF hand [Opisthorchis viverrini]	2	6	6	2	6	2	3	8	100
OON21655.1 glycosyltransferase, family 8, partial [Opisthorchis viverrini]	34.9925	52.41	5.47	68.2727					Single Protein		OON21655.1 glycosyltransferase, family 8, partial [Opisthorchis viverrini]	2	4	4	2	4	2	2	5	100
OON21679.1 hypothetical protein X801_02421 [Opisthorchis viverrini]	73.1418	84.1	4.17	25.5725					Single Protein		OON21679.1 hypothetical protein X801_02421 [Opisthorchis viverrini]	2	4	4	2	4	2	2	4	100
OON21826.1 hypothetical protein X801_02278 [Opisthorchis viverrini]	20.8969	83.25	10.47	92.3184					Single Protein		OON21826.1 hypothetical protein X801_02278 [Opisthorchis viverrini]	2	3	2	2	3	2	2	4	100
OON22295.1 hypothetical protein X801_01800, partial [Opisthorchis viverrini]	36.2763	48.92	8.31	68.2727					Single Protein		OON22295.1 hypothetical protein X801_01800, partial [Opisthorchis viverrini]	2	3	3	2	3	2	2	3	100
OON22627.1 hypothetical protein X801_01468, partial [Opisthorchis viverrini]	20.2435	85.14	12.57	83.8779					Single Protein		OON22627.1 hypothetical protein X801_01468, partial [Opisthorchis viverrini]	2	4	4	2	4	2	3	4	100
OON22662.1 hypothetical protein X801_01433 [Opisthorchis viverrini]	9.42529	100	23.81	174.746	Deamidation of Q(Q46)	Deamidation of Q(1)			Single Protein		OON22662.1 hypothetical protein X801_01433 [Opisthorchis viverrini]	2	6	6	2	6	2	2	7	100
OON22784.1 L-lactate dehydrogenase [Opisthorchis viverrini]	35.6807	68.9	11.59	75.7746					Single Protein		OON22784.1 L-lactate dehydrogenase [Opisthorchis viverrini]	3	10	7	2	10	3	3	11	100
OON22794.1 Sec1 family protein, partial [Opisthorchis viverrini]	48.9517	77.75	4.45	54.669					Single Protein		OON22794.1 Sec1 family protein, partial [Opisthorchis viverrini]	2	6	6	2	6	2	3	7	100
OON22988.1 cellulase [Opisthorchis viverrini]	58.0399	74.51	5.29	59.8151					Single Protein		OON22988.1 cellulase [Opisthorchis viverrini]	2	5	5	2	5	2	4	6	100
OON23450.1 Ras family protein [Opisthorchis viverrini]	18.7695	100	19.28	277.909					Single Protein		OON23450.1 Ras family protein [Opisthorchis viverrini]	3	4	3	2	3	2	10	16	100
OON23545.1 Synaptobrevin [Opisthorchis viverrini]	10.5358	72.04	21.51	157.835					Single Protein		OON23545.1 Synaptobrevin [Opisthorchis viverrini]	2	5	5	2	5	2	3	7	100
OON24043.1 hypothetical protein X801_00047 [Opisthorchis viverrini]	44.8723	78.16	4.71	46.5988					Single Protein		OON24043.1 hypothetical protein X801_00047 [Opisthorchis viverrini]	2	4	4	2	4	2	2	4	100
